# Supplementary material for: Maternal Multiple Micronutrient Supplementation Stabilizes Mitochondrial DNA Copy Number in Pregnant Women in Lombok, Indonesia
Source: PubMed Central journal article supplement — J Nutr. 2019 Jun 9;149(8):1309–16. doi: 10.1093/jn/nxz064 (PMC6686057; doi:10.1093/jn/nxz064), 2019-06-09
Supplement: nxz064_supplemental_table.pdf [file nxz064_supplemental_table.pdf]

Supplementary data.

### SUPPLEMENTAL TABLE 1

Real-time quantitative PCR primers list for mtDNA copy number determination

| <b>Primer name</b> |       | <b>Sequence (5'-3')</b>   | <b>Length<br/>(base)</b> | <b>Tm<br/>(°C)</b> |
|--------------------|-------|---------------------------|--------------------------|--------------------|
| tRNA-leu           | F3212 | CACCCAAGAACAGGGTTTGT      | 20                       | 61                 |
|                    | R3319 | TGGCCATGGGTATGTTGTTA      | 20                       | 60                 |
| β2M                | F594  | TGCTGTCTCCATGTTTGATGTATCT | 25                       | 63                 |
|                    | R679  | TCTCTGCTCCCCACCTCTAAGT    | 22                       | 65                 |
